# Supplementary material
Source: publisher site journal article supplement (https://www.dovepress.com/article/345855)
Supplement: Supplementary file 1 [file get_supplementary_file.php]

|    |     |      |    |   |   |    |   |   |   |   |
|----|-----|------|----|---|---|----|---|---|---|---|
| 31 | 8   | 2016 | S  | R | R | R  | S | S | S | S |
| 32 | 10  | 2016 | R  | R | S | R  | S | S | S | R |
| 33 | 12  | 2016 | R  | R | R | S  | S | S | S | R |
| 34 | 13  | 2016 | R  | R | R | R  | S | S | S | R |
| 35 | 15  | 2016 | R  | R | R | R  | S | S | S | R |
| 36 | 16  | 2016 | R  | R | R | R  | S | S | S | R |
| 37 | 17  | 2016 | R  | R | R | R  | S | S | S | R |
| 38 | 18  | 2016 | R  | R | R | R  | S | S | S | R |
| 39 | 19  | 2016 | R  | R | R | S  | S | S | S | S |
| 40 | 24  | 2016 | R  | R | R | R  | S | S | S | R |
| 41 | 25  | 2016 | R  | R | R | R  | S | S | S | R |
| 42 | 28  | 2016 | R  | R | R | R  | S | S | S | R |
| 43 | 30  | 2016 | R  | R | R | R  | S | S | S | R |
| 44 | 31  | 2016 | R  | R | R | R  | S | S | S | R |
| 45 | 32  | 2016 | R  | R | R | R  | S | S | S | R |
| 46 | 33  | 2016 | R  | R | R | R  | S | S | S | R |
| 47 | 40  | 2016 | R  | R | R | R  | S | S | S | R |
| 48 | 41  | 2016 | R  | R | R | R  | S | S | S | S |
| 49 | 42  | 2016 | R  | R | R | R  | S | S | S | R |
| 50 | 50  | 2016 | R  | R | R | S  | S | S | S | R |
| 51 | 55  | 2016 | R  | R | R | S  | S | S | S | S |
| 52 | 57  | 2016 | S  | R | R | R  | S | S | S | S |
| 53 | 64  | 2016 | R  | R | R | R  | S | S | S | R |
| 54 | 120 | 2016 | R  | R | R | S  | S | S | S | S |
| 55 | 220 | 2016 | R  | R | R | S  | S | S | S | S |
| 56 | 320 | 2016 | ND | R | R | ND | S | S | S | R |
| 57 | 520 | 2016 | R  | R | R | S  | S | S | S | S |
| 58 | 901 | 2016 | S  | S | S | S  | S | S | S | S |

### DST of Strains from Lucknow

| S. No | Strain ID | Year | FLD Resistance Profile |   |   |   | SLD Resistance Profile |     |     |     |
|-------|-----------|------|------------------------|---|---|---|------------------------|-----|-----|-----|
|       |           |      | S                      | H | R | E | KAN                    | AMK | CAP | OFX |
| 1     | 915       | 2012 | R                      | R | R | R | R                      | R   | R   | R   |
| 2     | 43RN      | 2013 | R                      | R | R | R | R                      | S   | S   | S   |
| 3     | 47        | 2013 | S                      | S | S | R | R                      | S   | R   | S   |
| 4     | 2009      | 2012 | R                      | R | R | S | R                      | R   | R   | R   |
| 5     | 40RN      | 2013 | S                      | S | R | S | R                      | S   | S   | S   |

|    |       |      |    |   |   |    |   |    |    |    |
|----|-------|------|----|---|---|----|---|----|----|----|
| 6  | 66    | 2013 | S  | S | S | R  | R | S  | S  | S  |
| 8  | 233   | 2013 | S  | S | R | R  | R | S  | S  | R  |
| 8  | 367   | 2013 | R  | R | R | R  | R | R  | R  | R  |
| 9  | 403   | 2013 | R  | R | R | R  | R | S  | R  | R  |
| 10 | 416   | 2013 | R  | R | R | R  | R | S  | R  | S  |
| 11 | 451   | 2013 | R  | R | R | R  | R | S  | R  | R  |
| 12 | 456   | 2013 | R  | S | S | R  | R | S  | S  | S  |
| 13 | 509   | 2013 | R  | R | R | R  | R | S  | S  | R  |
| 14 | 658   | 2013 | R  | R | R | S  | R | S  | R  | S  |
| 15 | 665   | 2013 | S  | R | R | S  | R | S  | S  | S  |
| 16 | 3507  | 2013 | R  | R | R | R  | R | R  | R  | R  |
| 17 | 633   | 2013 | R  | R | R | R  | R | R  | R  | R  |
| 18 | 53    | 2013 | R  | S | S | S  | R | S  | R  | S  |
| 19 | 3506  | 2013 | S  | S | R | S  | R | S  | R  | S  |
| 20 | 65DP  | 2012 | R  | R | R | S  | R | S  | R  | S  |
| 21 | 702   | 2013 | R  | S | R | S  | R | S  | S  | R  |
| 22 | 34RN  | 2013 | S  | R | R | R  | R | S  | S  | S  |
| 23 | 103RN | 2013 | R  | R | R | R  | R | R  | R  | R  |
| 24 | 3470  | 2013 | R  | R | R | R  | R | S  | S  | R  |
| 25 | 148RN | 2013 | S  | R | R | R  | R | S  | R  | R  |
| 26 | 446   | 2013 | S  | R | R | S  | R | R  | R  | ND |
| 27 | 1031  | 2012 | S  | S | R | S  | R | S  | S  | R  |
| 28 | 2047  | 2012 | R  | R | R | S  | R | S  | S  | R  |
| 29 | 131RN | 2012 | S  | R | S | S  | R | S  | S  | S  |
| 30 | 747   | 2016 | ND | R | R | ND | R | ND | ND | R  |
| 31 | 1481  | 2016 | ND | R | R | ND | R | ND | ND | R  |
| 32 | 1809  | 2016 | ND | R | R | ND | R | ND | ND | R  |
| 33 | 1982  | 2016 | ND | R | R | ND | R | ND | ND | R  |
| 34 | 2321  | 2016 | ND | R | R | ND | R | ND | ND | R  |
| 35 | 13RN  | 2013 | S  | S | R | S  | S | S  | S  | S  |
| 36 | 28RN  | 2013 | S  | R | R | S  | S | S  | S  | S  |
| 37 | 44RN  | 2013 | R  | R | R | R  | S | S  | S  | S  |
| 38 | 125   | 2013 | S  | S | S | S  | S | S  | S  | S  |
| 39 | 482   | 2013 | S  | R | R | S  | S | S  | S  | S  |
| 40 | 641   | 2013 | S  | R | S | R  | S | S  | S  | S  |
| 41 | 653   | 2013 | R  | R | R | R  | S | S  | S  | S  |
| 42 | 105   | 2013 | S  | S | S | S  | S | S  | S  | S  |
| 43 | 3509  | 2013 | S  | S | S | R  | S | S  | R  | S  |
| 44 | 81    | 2013 | S  | S | S | R  | S | S  | S  | S  |

|    |       |      |    |   |   |    |   |    |    |   |
|----|-------|------|----|---|---|----|---|----|----|---|
| 45 | 3532  | 2013 | R  | R | R | R  | S | S  | S  | S |
| 46 | 335   | 2013 | R  | R | R | R  | S | S  | S  | R |
| 47 | 417   | 2013 | R  | R | R | S  | S | S  | S  | S |
| 48 | 3480  | 2013 | S  | R | R | R  | S | S  | S  | R |
| 49 | 706   | 2013 | R  | R | R | S  | S | R  | S  | S |
| 50 | 337   | 2012 | R  | R | R | R  | S | S  | S  | S |
| 51 | 2099  | 2012 | S  | R | S | R  | S | S  | S  | R |
| 52 | 2427  | 2012 | R  | R | S | S  | S | S  | S  | R |
| 53 | 891   | 2012 | R  | R | R | R  | S | S  | S  | R |
| 54 | 358RN | 2013 | R  | R | R | S  | S | S  | S  | R |
| 55 | 3118  | 2013 | R  | R | R | R  | S | S  | R  | R |
| 56 | 3334  | 2013 | R  | R | R | R  | S | S  | S  | R |
| 57 | 3514  | 2013 | R  | R | R | R  | S | S  | S  | R |
| 58 | 3516  | 2013 | S  | R | R | S  | S | S  | S  | R |
| 59 | 3537  | 2013 | R  | R | R | R  | S | S  | S  | R |
| 60 | 10    | 2013 | R  | R | R | R  | S | S  | R  | R |
| 61 | 83    | 2013 | R  | R | R | R  | S | S  | S  | R |
| 62 | 164   | 2013 | R  | R | R | R  | S | R  | S  | S |
| 63 | 166   | 2013 | R  | R | R | R  | S | S  | R  | R |
| 64 | 2703  | 2016 | ND | R | R | ND | S | S  | S  | S |
| 65 | 2705  | 2016 | ND | R | R | ND | S | S  | S  | S |
| 66 | 2706  | 2016 | ND | R | R | ND | S | S  | S  | S |
| 67 | 3900  | 2016 | ND | R | R | ND | S | ND | ND | R |
| 68 | 4198  | 2016 | ND | R | R | ND | S | ND | ND | R |

S used as FLD: Streptomycin; H: Isoniazid; R used as FLD: Rifampicin; E: Ethambutol; Kan: Kanamycin; AMK: Amikacin; CAP: Capreomycin; OFX: Ofloxacin; ND: Drug susceptibility testing could not be determined; R: Resistant; S: Sensitive

**Supplementary Table 2: Primers used for the detection of mutations in the clinical strains**

| <b>Target region</b>               | <b>Primer sequence</b>                                                               | <b>Amplicon size (bp)</b> |
|------------------------------------|--------------------------------------------------------------------------------------|---------------------------|
| <b><i>eis</i> + promoter</b>       | FP: 5' CGA ATT CAC GTC GGT GCC GGA GCC GTC 3'<br>RP: 5' CAAGCTTTCAGAACTCGAACGCGGT 3' | 1400                      |
| <b><i>rrs2</i> (1400bp region)</b> | FP2:5' GTCAGCTCGTGTCGTGAGATGTTGG 3'<br>RP2:5'TGGCCAACTTTGTTGTCATGCACCCGG3'           | 531                       |
| <b><i>whiB7</i> + 5'UTR</b>        | FP: 5' GCTGCAGCTGGTTCGCGGTCGGACC 3'<br>RP: 5' GGT GGG CGC GAT CCT ATG CCA GC 3'      | 872                       |
| <b><i>gyrA</i> QRDR</b>            | FP1: 5' GCAGCTACATCGACTATGCGATGAG 3'<br>RP1: 5' AGC CGG GCT TCG GTG TAC CTC A 3'     | 325                       |
| <b><i>gyrB</i> QRDR</b>            | FP:5' CGTAAGGCACGAGAGTTGGTGCG 3'<br>RP: 5' TCAGCACGATCTTGTGGTAGCGCAG 3'              | 328                       |
| <b><i>tlyA</i></b>                 | FP1 5' GGA CCG TCT CTG GCC GAA CTC G 3'<br>RP1 5' ACG CGC CGT GCG GTC TCG GTG 3'     | 941                       |

**Supplementary Table 3:** Distribution of absolute numbers of major lineages observed among the respective drug resistant groups in Mumbai and Lucknow

| Spoligotype          | Number of OFX <sup>R</sup> isolates carrying <i>gyrA</i> and <i>gyrB</i> mutations |                | Number of KAN <sup>R</sup> isolates carrying <i>eis</i> , <i>rrs</i> , and <i>whiB7</i> mutations |                | Number of CAP <sup>R</sup> isolates carrying <i>rrs</i> and <i>tlyA</i> mutations |               |
|----------------------|------------------------------------------------------------------------------------|----------------|---------------------------------------------------------------------------------------------------|----------------|-----------------------------------------------------------------------------------|---------------|
|                      | Mumbai (n=40)                                                                      | Lucknow (n=25) | Mumbai (n=25)                                                                                     | Lucknow (n=16) | Mumbai (n=15)                                                                     | Lucknow (n=9) |
| <b>EAI5</b>          | 15                                                                                 | 2              | 12                                                                                                | 0              | 7                                                                                 | 0             |
| <b>Manu1</b>         | 1                                                                                  | 0              | 0                                                                                                 | 0              | 0                                                                                 | 0             |
| <b>Manu2</b>         | 3                                                                                  | 4              | 1                                                                                                 | 1              | 1                                                                                 | 2             |
| <b>Manu_ancestor</b> | 1                                                                                  | 0              | 1                                                                                                 | 0              | 0                                                                                 | 0             |
| <b>Beijing</b>       | 5                                                                                  | 2              | 0                                                                                                 | 2              | 0                                                                                 | 0             |
| <b>T1</b>            | 1                                                                                  | 3              | 0                                                                                                 | 1              | 0                                                                                 | 1             |
| <b>EAI3-IND</b>      | 1                                                                                  | 0              | 0                                                                                                 | 1              | 0                                                                                 | 0             |
| <b>CAS1-Delhi</b>    | 1                                                                                  | 2              | 0                                                                                                 | 2              | 0                                                                                 | 1             |
| <b>Orphan</b>        | 12                                                                                 | 12             | 11                                                                                                | 9              | 7                                                                                 | 5             |

**Supplementary Table 4: List of mutations in Kan<sup>R</sup> and Kan<sup>S</sup> strains**

**Kan<sup>R</sup> Strains of Mumbai**

| S. No. | Strain ID | <i>rrs</i>    | <i>eis</i> + promoter | <i>whiB7</i> + 5'UTR                       |
|--------|-----------|---------------|-----------------------|--------------------------------------------|
| 1      | 235       | A1401G, C513T | none                  | <u>G59A</u>                                |
| 2      | 148       | none          | none                  | None                                       |
| 3      | 403467    | A1401G        | none                  | None                                       |
| 4      | 189       | none          | none                  | <u>A43T, C44A, C47A, G48T, G59A</u>        |
| 5      | 321345    | none          | none                  | None                                       |
| 6      | 268       | none          | none                  | <u>G59A, T152G</u>                         |
| 7      | 401421    | A1401G        | none                  | None                                       |
| 8      | 527153    | A1401G        | none                  | <u>A43T, C44A, C47A, G48T, G59A</u>        |
| 9      | 526973    | A1401G        | none                  | None                                       |
| 10     | 521942    | A1401G        | none                  | <u>A43T, C44A, C47A, G48T, G59A, T152G</u> |
| 11     | 528052    | none          | none                  | <u>A43T, C44A, C47A, G48T, G59A, T152G</u> |
| 12     | 528597    | A1401G        | none                  | None                                       |
| 13     | 529238    | A1401G        | none                  | <u>A43T, C44A, C47A, G48T, G59A, T152G</u> |
| 14     | 14        | none          | none                  | <u>C253T</u>                               |
| 15     | 20        | none          | G-10C                 | <u>C253T</u>                               |
| 16     | 22        | none          | C-14T                 | <u>G59A</u>                                |
| 17     | 26        | none          | none                  | <u>A43T, C44A, C47A, G48T, G59A</u>        |
| 18     | 29        | C1402T        | none                  | <u>G59A</u>                                |
| 19     | 47        | none          | G487A                 | <u>C253T</u>                               |
| 20     | 65        | A1401G        | none                  | <u>G59A</u>                                |
| 21     | 67        | A1401G        | none                  | None                                       |
| 22     | 69        | A1401G        | none                  | None                                       |
| 23     | 72        | none          | C-14T                 | None                                       |
| 24     | 420       | A1401G        | none                  | None                                       |
| 25     | 101R      | A1401G        | none                  | <u>G59A</u>                                |
| 26     | 102R      | A1401G        | none                  | <u>G59A</u>                                |
| 27     | 103R      | none          | none                  | <u>A43T, C44A, C47A, G48T, G59A</u>        |
| 28     | 104R      | A1401G        | G487A                 | <u>G59A</u>                                |
| 29     | 105R      | none          | none                  | <u>A43T, C44A, C47A, G48T, G59A</u>        |

**Kan<sup>R</sup> Strains of Lucknow**

| S. No. | Strain ID | <i>rrs</i>    | <i>eis</i> + promoter | <i>whiB7</i> + 5'UTR     |
|--------|-----------|---------------|-----------------------|--------------------------|
| 1      | 915       | G1484T        | none                  | none                     |
| 2      | 43RN      | none          | none                  | none                     |
| 3      | 47        | none          | none                  | none                     |
| 4      | 2009      | A1401G        | none                  | <b>A264G</b>             |
| 5      | 40RN      | none          | none                  | none                     |
| 6      | 66        | none          | none                  | none                     |
| 7      | 233       | none          | none                  | none                     |
| 8      | 367       | A1401G        | none                  | none                     |
| 9      | 403       | none          | none                  | none                     |
| 10     | 416       | G1484T        | none                  | none                     |
| 11     | 451       | none          | C-12T                 | none                     |
| 12     | 456       | none          | none                  | <b>+G127</b>             |
| 13     | 509       | none          | none                  | <b>ΔG177, +CG244</b>     |
| 14     | 658       | none          | none                  | none                     |
| 15     | 665       | none          | T204G                 | none                     |
| 16     | 3507      | G1484T        | none                  | none                     |
| 17     | 633       | none          | none                  | none                     |
| 18     | 53        | C517T         | none                  | none                     |
| 19     | 3506      | none          | none                  | none                     |
| 20     | 65DP      | none          | none                  | none                     |
| 21     | 702       | none          | C-14T                 | none                     |
| 22     | 34RN      | none          | none                  | none                     |
| 23     | 103RN     | none          | none                  | none                     |
| 24     | 3470      | G1484T        | none                  | none                     |
| 25     | 148RN     | G1484T        | G-37T                 | none                     |
| 26     | 446       | none          | none                  | none                     |
| 27     | 1031      | none          | none                  | none                     |
| 28     | 2047      | A1401G        | none                  | none                     |
| 29     | 131RN     | none          | none                  | none                     |
| 30     | 747       | none          | none                  | <b>G59A, C253T</b>       |
| 31     | 1481      | A1401G        | G487A                 | <b>G59A, C253T</b>       |
| 32     | 1809      | T1322A        | none                  | none                     |
| 33     | 1982      | A1401G, A514C | none                  | <b>G59A, A42C, C253T</b> |
| 34     | 2321      | A1401G, A514C | none                  | <u>T270G</u>             |

**Mutations marked in Red: *whiB7* 5'-UTR mutations**  
**Mutations marked in Blue: *whiB7* gene mutations**  
**Novel SNPs are underlined**

**Kan<sup>S</sup> strains of Mumbai**

| S. No. | Strain ID | <i>rrs</i> | <i>eis</i> + promoter | <i>whiB7</i> + 5'UTR |
|--------|-----------|------------|-----------------------|----------------------|
| 1      | 2         | none       | none                  | none                 |
| 2      | 8         | none       | none                  | none                 |
| 3      | 10        | none       | none                  | <u>G59A, C253T</u>   |
| 4      | 12        | none       | none                  | <u>G59A, C253T</u>   |
| 5      | 13        | A908C      | none                  | <u>G59A, C253T</u>   |
| 6      | 15        | none       | none                  | <u>C253T</u>         |
| 7      | 16        | none       | G487A                 | <u>C253T</u>         |
| 8      | 17        | none       | C-12T                 | <u>C253T</u>         |
| 9      | 18        | none       | none                  | <u>C253T</u>         |
| 10     | 19        | none       | none                  | <u>C253T</u>         |
| 11     | 24        | none       | none                  | <u>C253T</u>         |
| 12     | 25        | none       | G487A                 | none                 |
| 13     | 28        | none       | none                  | <u>C253T</u>         |
| 14     | 30        | none       | none                  | <u>C253T</u>         |
| 15     | 31        | none       | none                  | <u>G59A, C253T</u>   |
| 16     | 32        | none       | none                  | <u>G59A, C253T</u>   |
| 17     | 33        | none       | none                  | <u>ΔG177</u>         |
| 18     | 40        | none       | none                  | <u>C253T</u>         |
| 19     | 41        | none       | G487A                 | none                 |
| 20     | 42        | none       | G487A                 | <u>C253T</u>         |
| 21     | 50        | none       | none                  | <u>C253T</u>         |
| 22     | 55        | none       | none                  | <u>C253T</u>         |
| 23     | 57        | none       | none                  | <u>C253T</u>         |
| 24     | 64        | none       | none                  | <u>C253T</u>         |
| 25     | 120       | none       | none                  | <u>G59A, C253T</u>   |
| 26     | 220       | none       | none                  | none                 |
| 27     | 320       | none       | none                  | none                 |
| 28     | 520       | C513T      | none                  | <u>G59A, C253T</u>   |
| 29     | 901       | none       | none                  | <u>G59A</u>          |

**Kan<sup>S</sup> strains of Lucknow**

| S. No. | Strain ID | <i>rrs</i> | <i>eis</i> + promoter | <i>whiB7</i> + 5'UTR |
|--------|-----------|------------|-----------------------|----------------------|
| 1      | 13RN      | none       | none                  | none                 |
| 2      | 28RN      | none       | none                  | none                 |
| 3      | 44RN      | none       | none                  | none                 |
| 4      | 125       | none       | none                  | none                 |
| 5      | 482       | none       | none                  | none                 |
| 6      | 641       | none       | none                  | none                 |
| 7      | 653       | none       | none                  | none                 |
| 8      | 105       | none       | none                  | none                 |
| 9      | 3509      | none       | none                  | none                 |
| 10     | 81        | none       | none                  | none                 |
| 11     | 3532      | none       | none                  | none                 |
| 12     | 335       | A514C      | none                  | none                 |
| 13     | 417       | none       | none                  | none                 |
| 14     | 3480      | A1401G     | none                  | none                 |
| 15     | 706       | A514C      | none                  | none                 |
| 16     | 337       | none       | none                  | none                 |
| 17     | 2099      | none       | none                  | none                 |
| 18     | 2427      | none       | none                  | none                 |
| 19     | 891       | none       | none                  | none                 |
| 20     | 358RN     | none       | none                  | none                 |
| 21     | 3118      | none       | none                  | none                 |
| 22     | 3334      | none       | none                  | none                 |
| 23     | 3514      | none       | none                  | none                 |
| 24     | 3516      | none       | none                  | none                 |
| 25     | 3537      | none       | none                  | none                 |
| 26     | 10        | none       | none                  | none                 |
| 27     | 83        | none       | none                  | none                 |
| 28     | 164       | none       | none                  | none                 |
| 29     | 166       | none       | none                  | none                 |
| 30     | 2703      | none       | none                  | <u>C253T</u>         |
| 31     | 2705      | none       | none                  | none                 |
| 32     | 2706      | none       | none                  | none                 |
| 33     | 3900      | none       | none                  | none                 |
| 34     | 4198      | none       | G487A                 | none                 |

**Mutations marked in Red: *whiB7* 5'-UTR mutations**  
**Mutations marked in Blue: *whiB7* gene mutations**  
**Novel SNPs are underlined**



## Supplementary Table 5: List of mutations in CAP<sup>R</sup>, CAP<sup>S</sup> and CAP<sup>ND</sup> strains

CAP<sup>R</sup> strains of Mumbai

| S. No. | Strain ID | <i>tlyA</i> | <i>rrs</i>    |
|--------|-----------|-------------|---------------|
| 1      | 235       | A33G        | A1401G, C513T |
| 2      | 148       | none        | none          |
| 3      | 403467    | A33G        | A1401G        |
| 4      | 189       | none        | none          |
| 5      | 321345    | A33G        | none          |
| 6      | 268       | none        | none          |
| 7      | 401421    | none        | A1401G        |
| 8      | 527153    | A33G        | A1401G        |
| 9      | 526973    | none        | A1401G        |
| 10     | 521942    | A33G        | A1401G        |
| 11     | 529238    | A33G        | A1401G        |
| 12     | 14        | A33G        | none          |
| 13     | 29        | none        | C1402T        |
| 14     | 65        | A33G        | A1401G        |
| 15     | 67        | A33G        | A1401G        |
| 16     | 69        | A33G        | A1401G        |
| 17     | 72        | A33G        | none          |
| 18     | 420       | A33G        | A1401G        |
| 19     | 101R      | A33G        | A1401G        |
| 20     | 102R      | A33G        | A1401G        |
| 21     | 103R      | A33G        | none          |
| 22     | 104R      | none        | A1401G        |
| 23     | 105R      | none        | none          |

CAP<sup>R</sup> strains of Lucknow

| S. No. | Strain ID | <i>tlyA</i>         | <i>rrs</i> |
|--------|-----------|---------------------|------------|
| 1      | 915       | A33G                | G1484T     |
| 2      | 47        | A33G                | none       |
| 3      | 2009      | none                | A1401G     |
| 4      | 367       | none                | A1401G     |
| 5      | 403       | none                | none       |
| 6      | 416       | none                | G1484T     |
| 7      | 451       | A33G, C64T          | none       |
| 8      | 658       | A33G                | none       |
| 9      | 3507      | none                | G1484T     |
| 10     | 633       | none                | none       |
| 11     | 53        | A33G                | C517T      |
| 12     | 3506      | none                | none       |
| 13     | 65DP      | A33G, C64T          | none       |
| 14     | 103RN     | none                | none       |
| 15     | 148RN     | none                | G1484T     |
| 16     | 446       | none                | none       |
| 17     | 3509      | A33G                | none       |
| 18     | 3118      | A33G, <u>+CG200</u> | none       |
| 19     | 10        | A33G                | none       |
| 20     | 166       | A33G                | none       |

**Novel SNPs are underlined**

CAP<sup>S</sup> strains of Mumbai

| S. No. | Strain ID | <i>tlyA</i>        | <i>rrs</i> |
|--------|-----------|--------------------|------------|
| 1      | 528052    | A33G               | none       |
| 2      | 528597    | A33G               | A1401G     |
| 3      | 20        | A33G               | none       |
| 4      | 22        | A33G               | none       |
| 5      | 26        | A33G               | none       |
| 6      | 47        | A33G               | none       |
| 7      | 2         | A33G               | none       |
| 8      | 8         | A33G               | none       |
| 9      | 10        | A33G               | none       |
| 10     | 12        | A33G               | none       |
| 11     | 13        | A33G               | A908C      |
| 12     | 15        | A33G               | none       |
| 13     | 16        | A33G               | none       |
| 14     | 17        | A33G               | none       |
| 15     | 18        | A33G               | none       |
| 16     | 19        | A33G               | none       |
| 17     | 24        | A33G, <u>G165A</u> | none       |
| 18     | 25        | A33G               | none       |
| 19     | 28        | A33G               | none       |
| 20     | 30        | A33G               | none       |
| 21     | 31        | A33G               | none       |
| 22     | 32        | A33G               | none       |
| 23     | 33        | A33G               | none       |
| 24     | 40        | A33G               | none       |
| 25     | 41        | A33G               | none       |
| 26     | 42        | A33G               | none       |
| 27     | 50        | A33G               | none       |
| 28     | 55        | A33G               | none       |
| 29     | 57        | A33G, <u>G165A</u> | none       |
| 30     | 64        | A33G               | none       |
| 31     | 120       | A33G               | none       |
| 32     | 220       | A33G               | none       |
| 33     | 320       | A33G               | none       |
| 34     | 520       | A33G               | C513T      |
| 35     | 901       | A33G               | none       |

**Novel SNPs are underlined**

CAP<sup>S</sup> strains of Lucknow

| S. No. | Strain ID | <i>tlyA</i>        | <i>rrs</i> |
|--------|-----------|--------------------|------------|
| 1      | 43RN      | A33G               | none       |
| 2      | 40RN      | A33G               | none       |
| 3      | 66        | A33G               | none       |
| 4      | 233       | A33G               | none       |
| 5      | 456       | none               | none       |
| 6      | 509       | none               | none       |
| 7      | 665       | none               | none       |
| 8      | 702       | A33G               | none       |
| 9      | 34RN      | none               | none       |
| 10     | 3470      | none               | G1484T     |
| 11     | 1031      | none               | none       |
| 12     | 2047      | none               | A1401G     |
| 13     | 131RN     | none               | none       |
| 14     | 13RN      | A33G               | none       |
| 15     | 28RN      | A33G               | none       |
| 16     | 44RN      | A33G               | none       |
| 17     | 125       | A33G               | none       |
| 18     | 482       | A33G               | none       |
| 19     | 641       | A33G               | none       |
| 20     | 653       | A33G               | none       |
| 21     | 105       | A33G               | none       |
| 22     | 81        | A33G               | none       |
| 23     | 3532      | A33G               | none       |
| 24     | 335       | A33G               | A514C      |
| 25     | 417       | A33G               | none       |
| 26     | 3480      | A33G               | A1401G     |
| 27     | 706       | A33G, <u>C415G</u> | A514C      |
| 28     | 337       | A33G               | none       |
| 29     | 2099      | A33G               | none       |
| 30     | 2427      | A33G               | none       |
| 31     | 891       | A33G               | none       |
| 32     | 358RN     | A33G               | none       |
| 33     | 3334      | A33G               | none       |
| 34     | 3514      | A33G               | none       |
| 35     | 3516      | A33G               | none       |
| 36     | 3537      | A33G               | none       |
| 37     | 83        | A33G               | none       |
| 38     | 164       | A33G               | none       |
| 39     | 2703      | A33G               | none       |
| 40     | 2705      | A33G               | none       |
| 41     | 2706      | A33G               | none       |

**CAP<sup>ND</sup> strains of Lucknow**

| <b>S. No.</b> | <b>Strain ID</b> | <b>tlyA</b>         | <b><i>rrs</i></b> |
|---------------|------------------|---------------------|-------------------|
| 1             | 747              | A33G, + <u>G543</u> | none              |
| 2             | 1481             | A33G                | A1401G            |
| 3             | 1809             | A33G                | T1322A            |
| 4             | 1982             | A33G                | A1401G, A514C     |
| 5             | 2321             | A33G                | A1401G, A514C     |
| 6             | 3900             | A33G                | none              |
| 7             | 4198             | A33G                | none              |

**Novel SNPs are underlined**

## Supplementary Table 6: List of mutations in OFX<sup>R</sup>, OFX<sup>S</sup> and OFX<sup>ND</sup> strains

| OFX <sup>R</sup> strains of Mumbai |           |                    |             |
|------------------------------------|-----------|--------------------|-------------|
| S. No.                             | Strain ID | <i>gyrA</i>        | <i>gyrB</i> |
| 1                                  | 235       | Ala90Val, Ser95Thr | none        |
| 2                                  | 148       | Ala90Val, Ser95Thr | none        |
| 3                                  | 403467    | Asp94Gly, Ser95Thr | none        |
| 4                                  | 189       | S95T               | none        |
| 5                                  | 321345    | Ala90Val, Ser95Thr | none        |
| 6                                  | 268       | Ala90Val           | none        |
| 7                                  | 401421    | Ala90Val, Ser95Thr | none        |
| 8                                  | 527153    | Ala90Val, Ser95Thr | none        |
| 9                                  | 526973    | Ala90Val, Ser95Thr | Ala504Val   |
| 10                                 | 521942    | Gly88Cys, Ser95Thr | none        |
| 11                                 | 528052    | Asp94Gly, Ser95Thr | none        |
| 12                                 | 528597    | Ala90Val, Ser95Thr | none        |
| 13                                 | 529238    | Asp94Gly, Ser95Thr | none        |
| 14                                 | 14        | Asp94Gly, Ser95Thr | none        |
| 15                                 | 20        | Asp94Ala           | none        |
| 16                                 | 22        | Asp94Ala, Ser95Thr | +G1359      |
| 17                                 | 26        | Asp94Gly, Ser95Thr | none        |
| 18                                 | 29        | Asp94Ala, Ser95Thr | none        |
| 19                                 | 47        | Asp94Ala, Ser95Thr | none        |
| 20                                 | 65        | Asp94Gly, Ser95Thr | none        |
| 21                                 | 67        | Ala90Val, Ser95Thr | none        |
| 22                                 | 69        | Asp94Gly, Ser95Thr | none        |
| 23                                 | 72        | Asp94Gly, Ser95Thr | none        |
| 24                                 | 420       | Asp94Gly, Ser95Thr | none        |
| 25                                 | 101R      | S95T               | none        |
| 26                                 | 102R      | Ala90Val, Ser95Thr | +A1429      |
| 27                                 | 103R      | Asp94Gly, Ser95Thr | Glu501Asp   |
| 28                                 | 104R      | S95T               | none        |
| 29                                 | 10        | Ser95Thr, Ala90Val | none        |
| 30                                 | 12        | Ser95Thr, Asp94Gly | none        |
| 31                                 | 13        | Asp94His           | none        |
| 32                                 | 15        | Ser95Thr, Asp94Gly | none        |
| 33                                 | 16        | Ser95Thr, Asp94Ala | none        |
| 34                                 | 17        | Ser95Thr, Asp94Gly | none        |
| 35                                 | 18        | Ser95Thr, Asp94Gly | none        |
| 36                                 | 24        | Ser95Thr, Asp94Tyr | none        |
| 37                                 | 25        | Ser95Thr, Ser91Pro | Arg446Leu   |
| 38                                 | 28        | Ser95Thr, Asp94Ala | none        |
| 39                                 | 30        | S95T               | none        |
| 40                                 | 31        | Ser95Thr, Asp94Gly | none        |
| 41                                 | 32        | Ser95Thr, Asp94Gly | none        |
| 42                                 | 33        | Ser95Thr, Asp94Gly | Asn499Thr   |
| 43                                 | 40        | Ser95Thr, Asp94Gly | none        |
| 44                                 | 42        | Ser95Thr, Asp94Gly | none        |
| 45                                 | 50        | S95T               | none        |
| 46                                 | 64        | S95T               | none        |
| 47                                 | 320       | S95T               | none        |

| OFX <sup>R</sup> strains of Lucknow |           |                              |             |
|-------------------------------------|-----------|------------------------------|-------------|
| S. No.                              | Strain ID | <i>gyrA</i>                  | <i>gyrB</i> |
| 1                                   | 915       | Ser95Thr                     | none        |
| 2                                   | 2009      | Ser95Thr, Asp94Asn           | none        |
| 3                                   | 233       | Ser95Thr                     | none        |
| 4                                   | 367       | Ser91Pro, Ser95Thr           | none        |
| 5                                   | 403       | none                         | none        |
| 6                                   | 451       | Asp94His, Ser95Thr           | none        |
| 7                                   | 509       | Ala90Val, Asp94Gly, Ser95Thr | none        |
| 8                                   | 3507      | Asp94His, Ser95Thr           | none        |
| 9                                   | 633       | Ala90Val, S94T               | none        |
| 10                                  | 702       | Asp94Gly                     | none        |
| 11                                  | 103RN     | Ser95Thr                     | none        |
| 12                                  | 3470      | Asp94Tyr, Ser95Thr           | none        |
| 13                                  | 148RN     | Ser95Thr                     | none        |
| 14                                  | 1031      | Ser95Thr                     | none        |
| 15                                  | 2047      | Asp94Gly, Ser95Thr           | none        |
| 16                                  | 747       | Ser95Thr, Asp94Asn           | none        |
| 17                                  | 1481      | Asp94Asn, Ser95Thr           | none        |
| 18                                  | 1809      | Ala90Val                     | Thr500Ala   |
| 19                                  | 1982      | Ser95Thr, Asp94Gly           | none        |
| 20                                  | 2321      | Ser95Thr, Asp94Gly           | none        |
| 21                                  | 335       | Asp94Gly, Ser95Thr           | none        |
| 22                                  | 3480      | Ala90Val, Asp94Gly           | none        |
| 23                                  | 2099      | none                         | none        |
| 24                                  | 2427      | Ser95Thr                     | none        |
| 25                                  | 891       | Ala90Val, Ser95Thr           | none        |
| 26                                  | 358RN     | none                         | none        |
| 27                                  | 3118      | Asp94Gly, Ser95Thr,          | none        |
| 28                                  | 3334      | Asp94Gly, Ser95Thr           | none        |
| 29                                  | 3514      | Asp94Gly, Ser95Thr           | none        |
| 30                                  | 3516      | Ser95Thr, Ala90Val           | none        |
| 31                                  | 3537      | none                         | none        |
| 32                                  | 10        | Ala90Val                     | none        |
| 33                                  | 83        | none                         | none        |
| 34                                  | 166       | Ser95Thr, Asp94Asn           | none        |
| 35                                  | 3900      | Ser95Thr, Asp94Gly           | none        |
| 36                                  | 4198      | Ser95Thr, Asp94Gly           | none        |

Novel SNPs are underlined

**OFX<sup>S</sup> strains of Mumbai**

| S. No. | Strain ID | <i>gyrA</i> | <i>gyrB</i> |
|--------|-----------|-------------|-------------|
| 1      | 105R      | Ser95Thr    | none        |
| 2      | 2         | Ser95Thr    | none        |
| 3      | 8         | Ser95Thr    | none        |
| 4      | 19        | Ser95Thr    | none        |
| 5      | 41        | Ser95Thr    | none        |
| 6      | 55        | Ser95Thr    | none        |
| 7      | 57        | Ser95Thr    | none        |
| 8      | 120       | Ser95Thr    | none        |
| 9      | 220       | Ser95Thr    | none        |
| 10     | 520       | Ser95Thr    | none        |
| 11     | 901       | Ser95Thr    | none        |

**OFX<sup>S</sup> strains of Lucknow**

| S. No. | Strain ID | <i>gyrA</i>                     | <i>gyrB</i> |
|--------|-----------|---------------------------------|-------------|
| 1      | 43RN      | Ser95Thr                        | none        |
| 2      | 47        | Ser95Thr                        | none        |
| 3      | 40RN      | Ser95Thr, Ala90Val              | none        |
| 4      | 66        | Ser95Thr                        | none        |
| 5      | 416       | Asp94Gly, Ser95Thr              | none        |
| 6      | 456       | Ser95Thr                        | none        |
| 7      | 658       | Ser95Thr                        | none        |
| 8      | 665       | Ser95Thr                        | none        |
| 9      | 53        | Ser95Thr                        | none        |
| 10     | 3506      | none                            | none        |
| 11     | 65DP      | none                            | none        |
| 12     | 34RN      | Ser95Thr                        | none        |
| 13     | 131RN     | Ser95Thr                        | none        |
| 14     | 13RN      | none                            | none        |
| 15     | 28RN      | none                            | none        |
| 16     | 44RN      | Ser95Thr                        | none        |
| 17     | 125       | Ser95Thr                        | none        |
| 18     | 482       | none                            | none        |
| 19     | 641       | Ser95Thr                        | none        |
| 20     | 653       | Ser95Thr, Ala90Val              | none        |
| 21     | 105       | none                            | none        |
| 22     | 3509      | none                            | none        |
| 23     | 81        | Asp94Asn, Ser95Thr              | none        |
| 24     | 3532      | none                            | none        |
| 25     | 417       | none                            | none        |
| 26     | 706       | Ser95Thr                        | none        |
| 27     | 337       | none                            | none        |
| 28     | 164       | Asp94Gly, Ser95Thr,             | none        |
| 29     | 2703      | Ser95Thr                        | none        |
| 30     | 2705      | Ser95Thr                        | none        |
| 31     | 2706      | Ser95Thr, Asp94Asn,<br>Ser91Pro | none        |

**OFX<sup>ND</sup> strains of Lucknow**

| S. No. | Strain ID | <i>gyrA</i> | <i>gyrB</i> |
|--------|-----------|-------------|-------------|
| 1      | 446       | Ser95Thr    | none        |
